# Supplementary material for: Aggregation-induced emission luminogens for image-guided surgery in non-human primates
Source: PubMed Central journal article supplement (PMC9632329; doi:10.1038/s41467-021-26417-2), 2021-11-10
Supplement: 41467_2021_26417_MOESM1_ESM.pdf [file 41467_2021_26417_MOESM1_ESM.pdf]

## Supplementary information

### Aggregation-Induced Emission Luminogens for Image-Guided Surgery in Non-Human Primates

Danni Zhong<sup>1,2‡</sup>, Weiyu Chen<sup>3,8‡</sup>, Zhiming Xia<sup>2, 4,‡</sup>, Rong Hu<sup>5,‡</sup>, Yuchen Qi<sup>2,‡</sup>, Bo Zhou<sup>2</sup>,  
Wanlin Li<sup>2</sup>, Jian He<sup>2</sup>, Zhiming Wang<sup>5</sup>, Zujin Zhao<sup>5</sup>, Dan Ding<sup>6</sup>, Mei Tian<sup>11</sup>, Ben Zhong  
Tang<sup>5,7\*</sup>, and Min Zhou<sup>1,2,9,10\*</sup>,

<sup>1</sup>Eye Center, the Second Affiliated Hospital, Zhejiang University School of Medicine,  
Hangzhou 310009, China.

<sup>2</sup>Institute of Translational Medicine, Zhejiang University, Hangzhou, 310009, China.

<sup>3</sup>The Fourth Affiliated Hospital, Zhejiang University School of Medicine, Yiwu, 320000,  
China.

<sup>4</sup>Department of Nuclear Medicine, the Second Affiliated Hospital, Zhejiang University  
School of Medicine, Hangzhou 310009, China.

<sup>5</sup>NSFC Center for Luminescence from Molecular Aggregates, SCUT-HKUST Joint  
Research Institute, State Key Laboratory of Luminescent Materials and Devices,  
South China University of Technology, Guangzhou, 510640 China

<sup>6</sup>Key Laboratory of Bioactive Materials, Ministry of Education, and College of Life  
Sciences, Nankai University, Tianjin 300071, China

<sup>7</sup>Department of Chemistry, Hong Kong Branch of Chinese National Engineering  
Research Center for Tissue Restoration and Reconstruction, State Key Laboratory of  
Neuroscience and Division of Biomedical Engineering, The Hong Kong University of  
Science and Technology (HKUST), Clear Water Bay, Kowloon, Hong Kong, China

<sup>8</sup>Molecular Imaging Program at Stanford, Department of Radiology, Stanford  
University, Stanford, CA 94305-5427, USA

<sup>9</sup>Cancer Center, Zhejiang University, Hangzhou 310009, China.

<sup>10</sup>State Key Laboratory of Modern Optical Instrumentations, Zhejiang University,  
Hangzhou, 310058, China

<sup>11</sup>Department of Nuclear Medicine, Shandong Provincial Hospital Affiliated to  
Shandong First Medical University, Jinan, 250021, China.

‡These authors contributed equally to this work.

\*Corresponding authors. Email: zhoum@zju.edu.cn; tangbenz@ust.hk

## Content of Experiments, Tables and Supplementary Figures

33

34

35 Table. 1. Post-inspection of the rhesus macaque.

36 Table. 2. Changes in the bodyweight of rhesus macaque 1-day before and 180-day  
37 after operations.

38 Table. 3. Systematical Comparison of ICG dye and AIEgens.

39 Table. 4. Advanced performances and limitations of AIEgens and typical contrast  
40 agents.

41

42 Fig. S1. Characterizations of folic-AIEgen.

43 Fig. S2. Cell viabilities of different cells (HEK293, HL7702, 4T1, and fibroblast cells)  
44 after incubation with series concentrations of folic-AIEgen for 24 h,  
45 respectively.

46 Fig. S3. Folic-AIEgen for targeting cell imaging.

47 Fig. S4. Histological images of the major organs from the mice at 30 days after  
48 surgical operation.

49 Fig. S5. Histological images of the major organs from the rabbits at 30 days after  
50 surgical operation.

51 Fig. S6. Histological images of the major organs from the mice at 30 days after  
52 different treatments.

53 Fig. S7. Blood test results (a-l) for the rhesus macaques before and after the surgical  
54 operation.

55 Fig. S8. Specific tumor targeting ability of folic-AIEgen in the intraperitoneal SKOV3  
56 xenograft mouse model.

57 Fig. S9. Histological images of the major organs from the tumor-bearing mice at 30  
58 days after surgical operation.

59 Fig. S10. Blood test results for the SKOV3 tumor-bearing mice after the intravenous  
60 injection.

61 Fig. S11. Targeted imaging of folic-AIEgen in metastatic liver tumor.

62 Fig. S12. White light and bioluminescence images of intraperitoneal SKOV3 and Hela  
63 tumors bearing mice after surgery.

64 Fig. S13. Survival rate of intraperitoneal SKOV3 and Hela tumors bearing mice with or  
65 without surgery.

66 Fig. S14. Comparison of fluorescence characteristics and stability between ICG and  
67 folic-AIEgen.

68 Fig. S15. Schematic illustration of ICG and folic-AIEgen guided SLN dissection in  
69 nude mice.

70 Fig. S16. Biodistribution of ICG and folic-AIEgen in nude mice after intravenous  
71 administration.

72

73

74

| Behaviors check list | Results |
|----------------------|---------|
| Eating               | Normal  |
| Drinking             | Normal  |
| Urination            | Normal  |
| Defecation           | Normal  |
| Sleeping             | Normal  |
| Activity             | Normal  |
| Grooming             | Normal  |
| Neurological         | Normal  |

75

76

77 **Supplementary Table 1. Post-inspection of the rhesus macaque.** No  
78 abnormalities were observed in behaviors of rhesus macaque after operations,  
79 including eating, drinking, urination, defecation, sleeping, activity, grooming, and  
80 neurological status.

81

82

83

84

85

| Date                  | Body weight (Kg) |
|-----------------------|------------------|
| Before Surgery        | 5.80             |
| Post-Surgery: Day 1   | 5.88             |
| Post-Surgery: Day 7   | 5.98             |
| Post-Surgery: Day 30  | 6.22             |
| Post-Surgery: Day 90  | 6.38             |
| Post-Surgery: Day 180 | 6.55             |

86

87

88 **Supplementary Table 2. Changes in the bodyweight of rhesus macaque 1-day**  
89 **before and 180-day after operations.** Bodyweight of the monkey was monitored

90 1-day before and 180-day after the surgical operation. Over the whole period, no  
 91 greater fluctuations were observed after 180-day treatment (6.55 kg) than before  
 92 treatment (5.80 kg).

93  
 94  
 95

| Properties                   | ICG, NIR fluorescence<br>~850 nm                                                                                                                                                                                                                                                  | AI Egens, visible fluorescence<br>~540 nm                                                                                                                                                         |
|------------------------------|-----------------------------------------------------------------------------------------------------------------------------------------------------------------------------------------------------------------------------------------------------------------------------------|---------------------------------------------------------------------------------------------------------------------------------------------------------------------------------------------------|
| Component                    | Small organic dyes (<1 KD)                                                                                                                                                                                                                                                        | Fluorescent nanoparticles<br>(Diameter: ca 20 nm)                                                                                                                                                 |
| Dispersibility               | Dispersed in sterile water but easily aggregated in physiological saline                                                                                                                                                                                                          | Well dispersed in both sterile water and physiological saline                                                                                                                                     |
| Fluorescent stability        | <ol style="list-style-type: none"> <li>1. Decrease to &lt;40% of initial fluorescence intensity within 24 h at 37 °C;</li> <li>2. Rapid photobleaching to ~52% in 105 min under continuous laser irradiation</li> </ol>                                                           | <ol style="list-style-type: none"> <li>1. Remain stable during 3-day storage;</li> <li>2. Possess superior photostability, preserving ~80% during 105 min continuous laser irradiation</li> </ol> |
| Real-time surgical operation | <ol style="list-style-type: none"> <li>1. NIR fluorescence imaging system, including NIR excitation light, collection optics, filtration, NIR camera, color camera;</li> <li>2. Assisted by surgeon's guidance due to undetectable NIR fluorescence seen by naked eyes</li> </ol> | Portable UV lamp                                                                                                                                                                                  |
| Medical equipment cost       | High cost (~100,000 US dollars)                                                                                                                                                                                                                                                   | Low cost (100-500 US dollars)                                                                                                                                                                     |
| Medical training             | Long-term training time                                                                                                                                                                                                                                                           | No additional training<br>Simple operation procedure                                                                                                                                              |

96  
 97  
 98  
 99  
 100  
 101  
 102  
 103  
 104  
 105  
 106  
 107  
 108  
 109

**Supplementary Table 3. Systematical Comparison of ICG dye and AI Egens.**

110

| Typical example                       | Method                         | Diameter   | Advanced performances                                                                                                                                                   | Limitations                                                                                                                                                                                            |
|---------------------------------------|--------------------------------|------------|-------------------------------------------------------------------------------------------------------------------------------------------------------------------------|--------------------------------------------------------------------------------------------------------------------------------------------------------------------------------------------------------|
| <sup>99m</sup> Techneium nanocolloids | Nuclear imaging                | 50~3000 nm | Detect deep-seated targets (~ 25 mm)                                                                                                                                    | <ol style="list-style-type: none"> <li>1. Large sizes;</li> <li>2. Slow clearance from injection site;</li> <li>3. Slow physiologic transport within lymphatics</li> </ol>                             |
| ICG                                   | MR fluorescence imaging        | <1 KD      | Detect superficially located targets (~5 mm)                                                                                                                            | Extravasation and nonspecific tissue scattering                                                                                                                                                        |
| Evans blue                            | Visible blue color             | <1 KD      | Aid visual identification under white-light illuminations                                                                                                               | <ol style="list-style-type: none"> <li>1. Limited tissue penetration;</li> <li>2. Lose visibility when intraoperative bleeding;</li> <li>3. Extravasation and nonspecific tissue scattering</li> </ol> |
| AIEngens                              | Naked eye visible fluorescence | ~20 nm     | <ol style="list-style-type: none"> <li>1. Aid visual identification under UV-light illuminations;</li> <li>2. Visualize the draining lymphatics in real time</li> </ol> | Limited tissue penetration                                                                                                                                                                             |

111

112

113

114

115

116

117

118

119

120

121

122

123

124

125

126

127

128

129

130

131

132

133

134

135

**Supplementary Table 4. Advanced performances and limitations of AIEngens and typical contrast agents.**

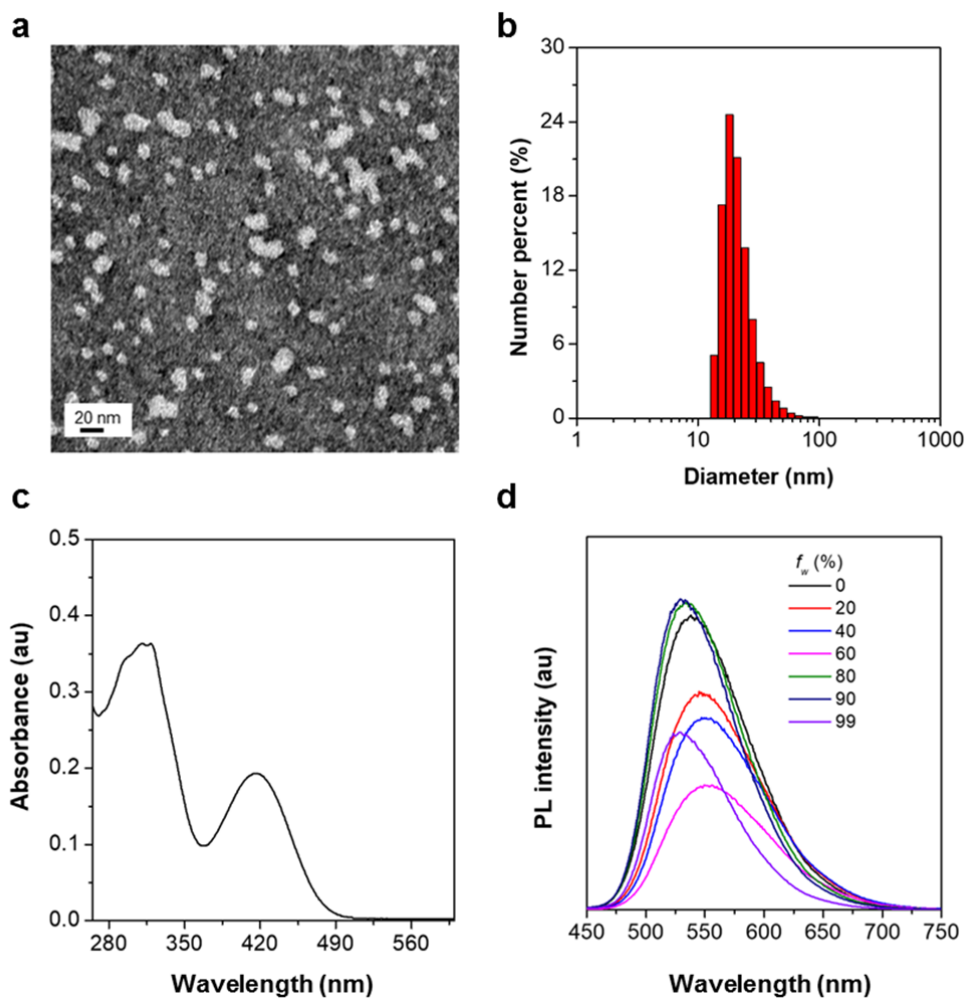

136

137

138 **Supplementary Figure 1. Characterizations of folic-AIEgen.** (a) Transmission  
 139 electron microscopy (TEM) image. **The experiment was repeated at least three times.**  
 140 (b) DLS, and (c) UV-vis spectra of the as-prepared folic-AIEgen. (d)  
 141 Photoluminescence of AIEgen in tetrahydrofuran with different fraction of water.

142

143

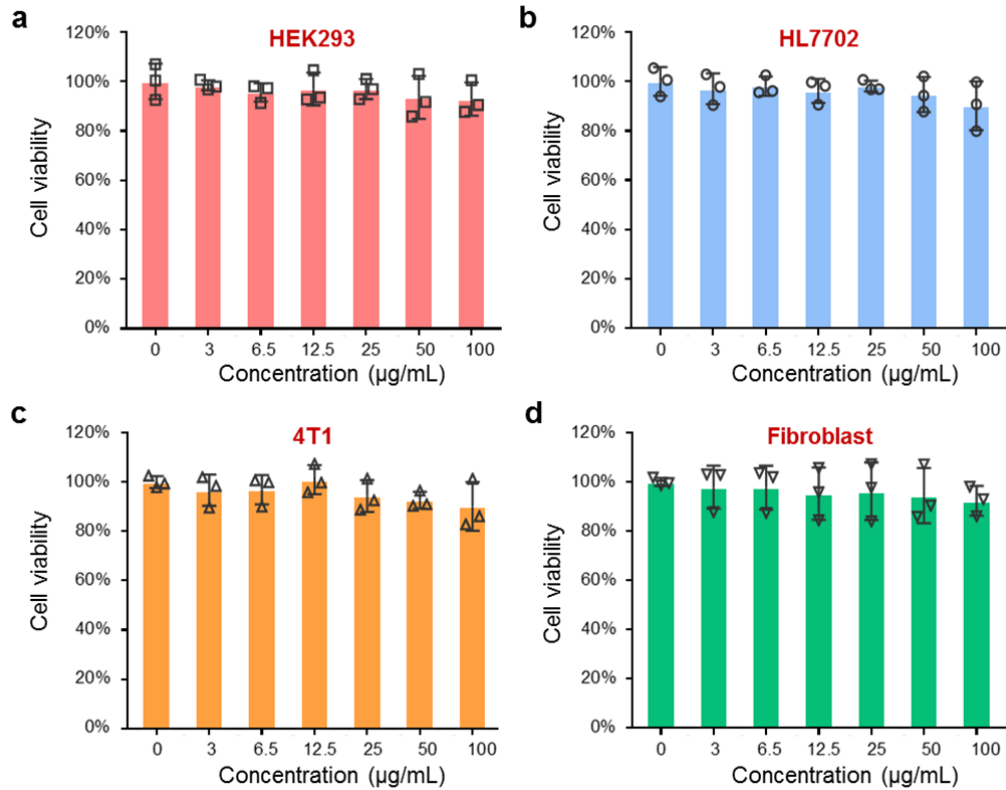

144

145

146 **Supplementary Figure 2. Cell viabilities of different cells (HEK293, HL7702, 4T1,**  
 147 **and fibroblast cells) after incubation with series concentrations of folic-AIEgen**  
 148 **for 24 hours, respectively. No significance was observed in terms of cell viability**  
 149 **among four types of cells** incubated with different concentrations of folic-AIEgen. **Data**  
 150 **are means ± SD, n = 3.**

151

152

153

154

155

156

157

158

159

160

161

162

163

164

165

166

167

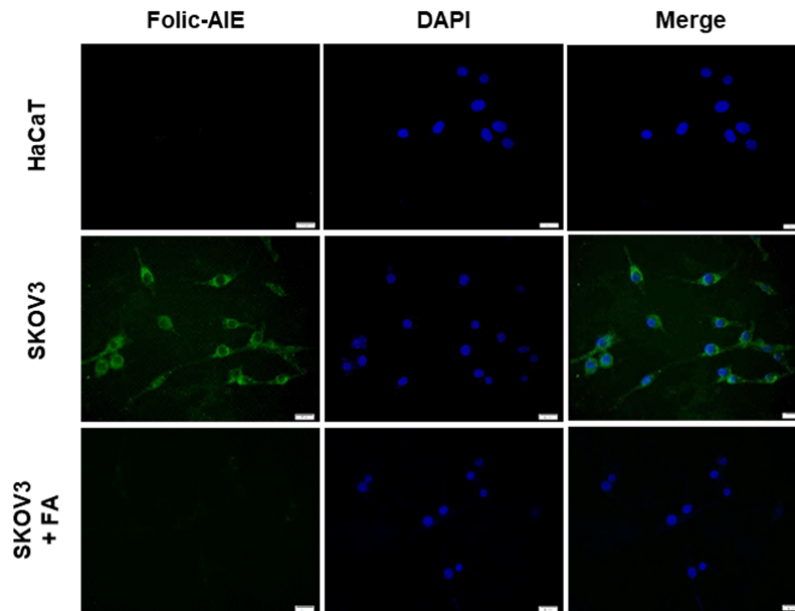

169

170

171 **Supplementary Figure 3. Folic-AIEgen for targeting cell imaging.** SKOV3 cells  
 172 with over-expressing FR displayed a significant enrichment of folic-AIEgen after  
 173 incubation (middle) and free folic acid competitively inhibited the uptake of  
 174 folic-AIEgen (bottom). **HacaT** cells (with a middle expression of FR) did not tend to  
 175 internalize folic-AIEgen nanoparticles after 24-hour incubation (top). Scale bars = 50  
 176  $\mu\text{m}$ . **The experiment was repeated at least three times.**

177

178

179

180

181

182

183

184

185

186

187

188

189

190

191

192

193

194

195

196



197  
198

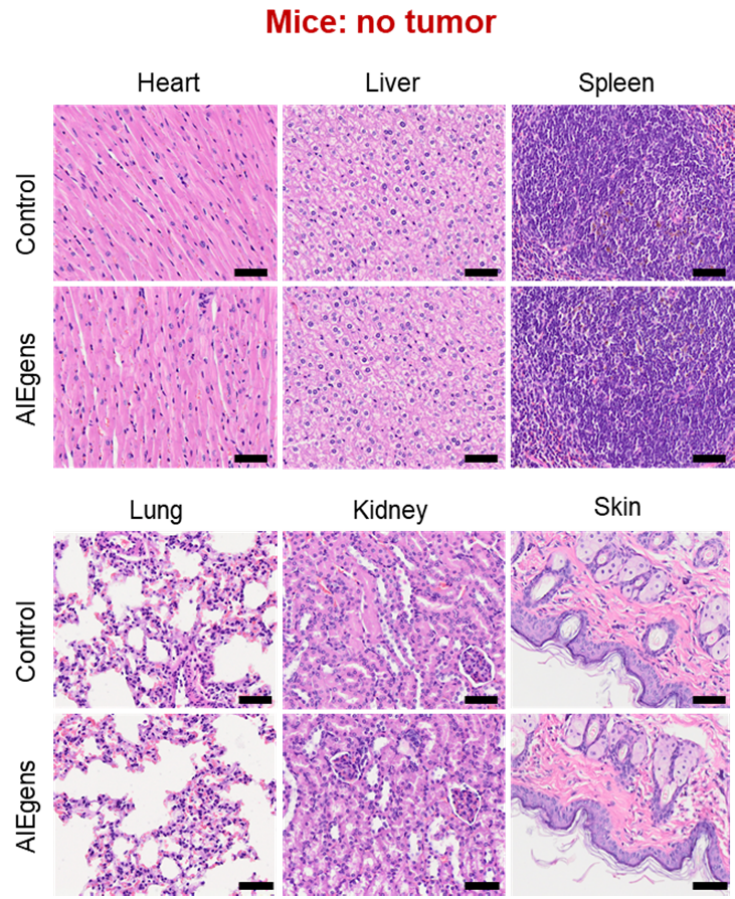

199  
200  
201  
202  
203  
204  
205  
206  
207  
208  
209  
210  
211  
212  
213  
214  
215  
216

**Supplementary Figure 4. Histological images of the major organs from the mice at 30 days after surgical operation.** Representative H&E staining images of heart, liver, spleen, lung, kidney, and skin. Scale bar = 50  $\mu$ m. The experiment was repeated at least three times.

217

**Rabbit: no tumor**

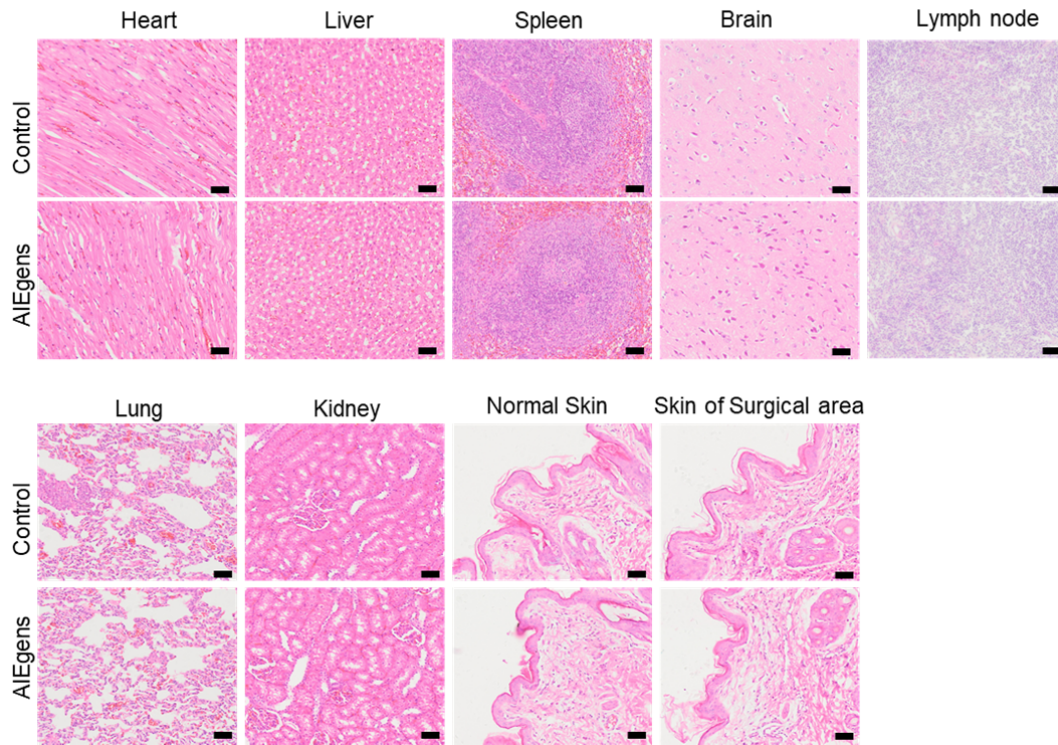

218

219

220 **Supplementary Figure 5. Histological images of the major organs from the**  
221 **rabbits at 30 days after surgical operation.** Representative **H&E staining** images of  
222 heart, liver, spleen, lung, kidney, normal skin, and skin of surgical area. Scale bar = 50  
223  $\mu\text{m}$ . **The experiment was repeated at least three times.**

224

225

226

227

228

229

230

231

232

233

234

235

236

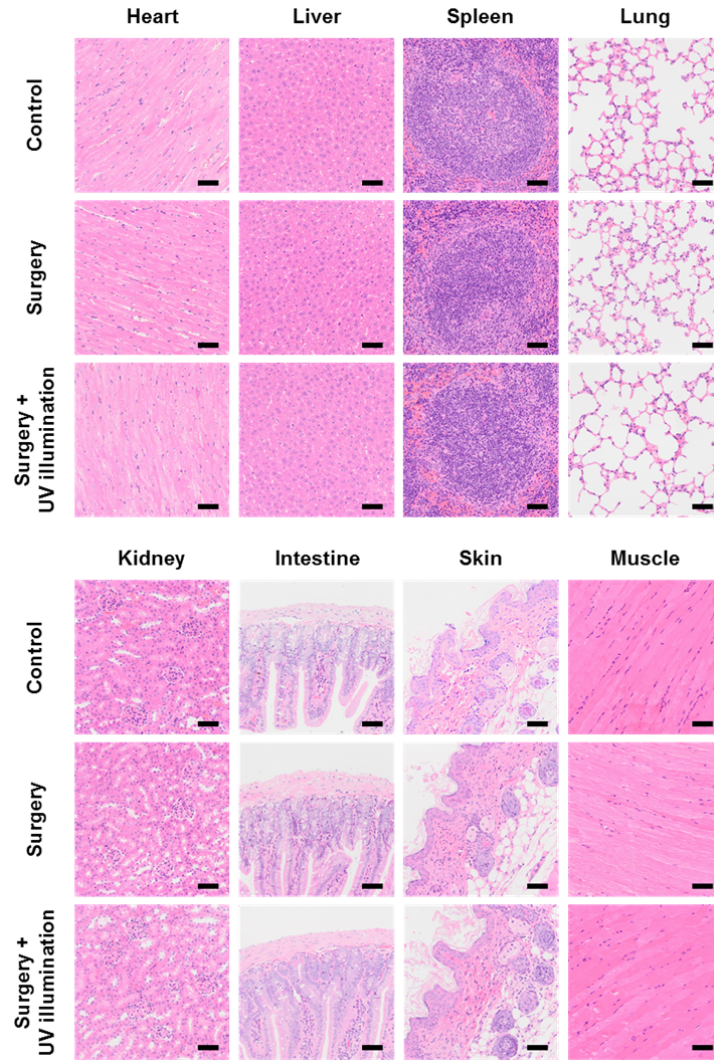

237  
 238  
 239  
 240  
 241  
 242  
 243  
 244  
 245  
 246  
 247  
 248  
 249  
 250  
 251  
 252  
 253

**Supplementary Figure 6. Histological images of the major organs from the mice at 30 days after different treatments.** Representative H&E staining images of heart, liver, spleen, lung, kidney, intestine, skin and muscle (n = 6). Scale bar = 50 μm. The experiment was repeated at least three times.

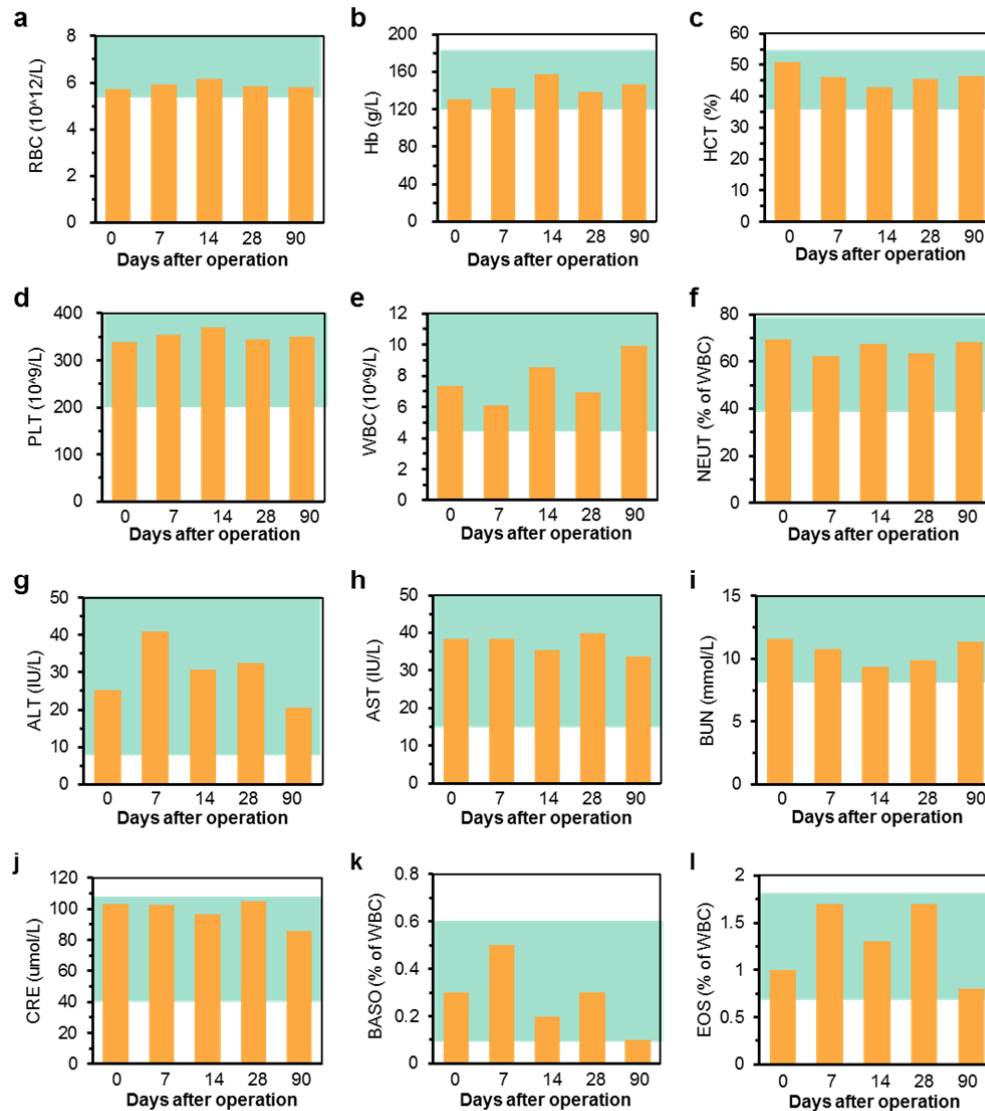

254  
 255 **Supplementary Figure 7. Blood test results (a-l) for the rhesus macaques before**  
 256 **and after the surgical operation.** There were no abnormalities in liver and kidney  
 257 function, complete blood count and immune system over the 90-day post-treatment.  
 258 Abbreviations: haemoglobin, Hb; red blood cell count, RBC; haematocrit, Hct; platelet  
 259 count, PLT; white blood cell count, WBC; neutrophil granulocyte, NEUT; lymphocyte,  
 260 LY; monocyte, MONO; eosinophil granulocyte, EOS; basophil granulocyte, BASO;  
 261 alanine transaminase, ALT; aspartate transaminase, AST; blood urea nitrogen, BUN;  
 262 creatinine, CRE. The regions rendered in GREEN represent the normal range. Before  
 263 the operation, the animal is subject to blood testing as the normal control.

264  
 265  
 266  
 267  
 268

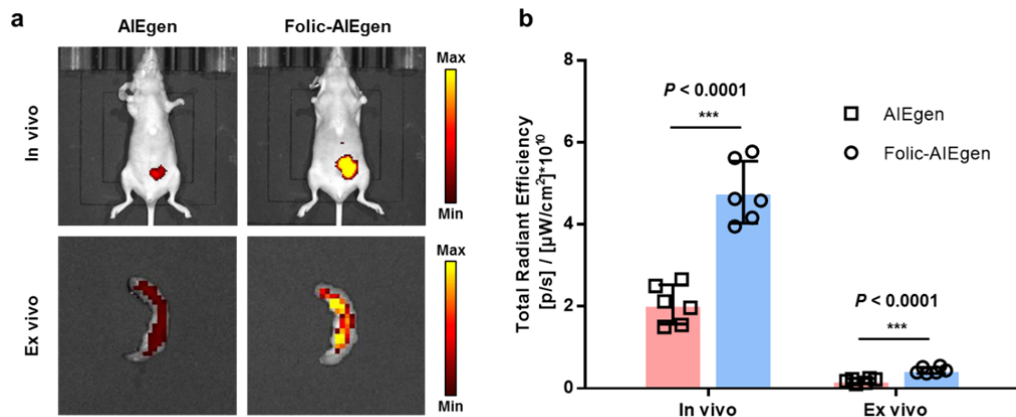

269

270

271

272

273

274

275

276

277

278

**Supplementary Figure 8. Specific tumor targeting ability of folic-AIEgen in the intraperitoneal SKOV3 xenograft mouse model.** (a) In vivo fluorescence imaging of mice (top) 24 hours after intraperitoneal injection of AIEgen or folic-AIEgen (100 μL, 40 μg/mL) and Ex vivo fluorescence imaging of the intestine tissues with tumors collected from mice (bottom) (n = 6). (b) Quantitative analysis of the fluorescence signals of the in vivo and ex vivo images. Data are means ± SD, n = 6, Student's two-tailed t test, \*\*\* $P < 0.001$ .

### Mice: SKOV3 tumor-bearing

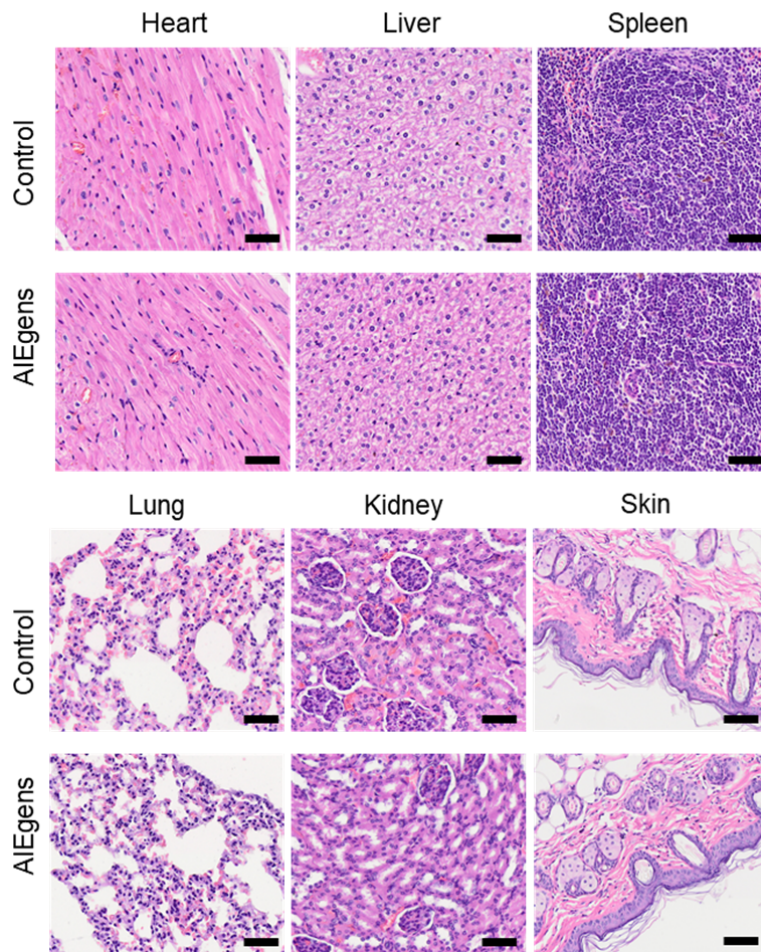

280

281

282 **Supplementary Figure 9. Histological images of the major organs from the**283 **tumor-bearing mice at 30 days after surgical operation. Representative H&E**284 **staining images of heart, liver, spleen, lung, kidney, and skin. Scale bar = 50 μm. The**285 **experiment was repeated at least three times.**

286

287

288

289

290

291

292

293

294

295

296

297

**Mice: SKOV3 tumor-bearing**

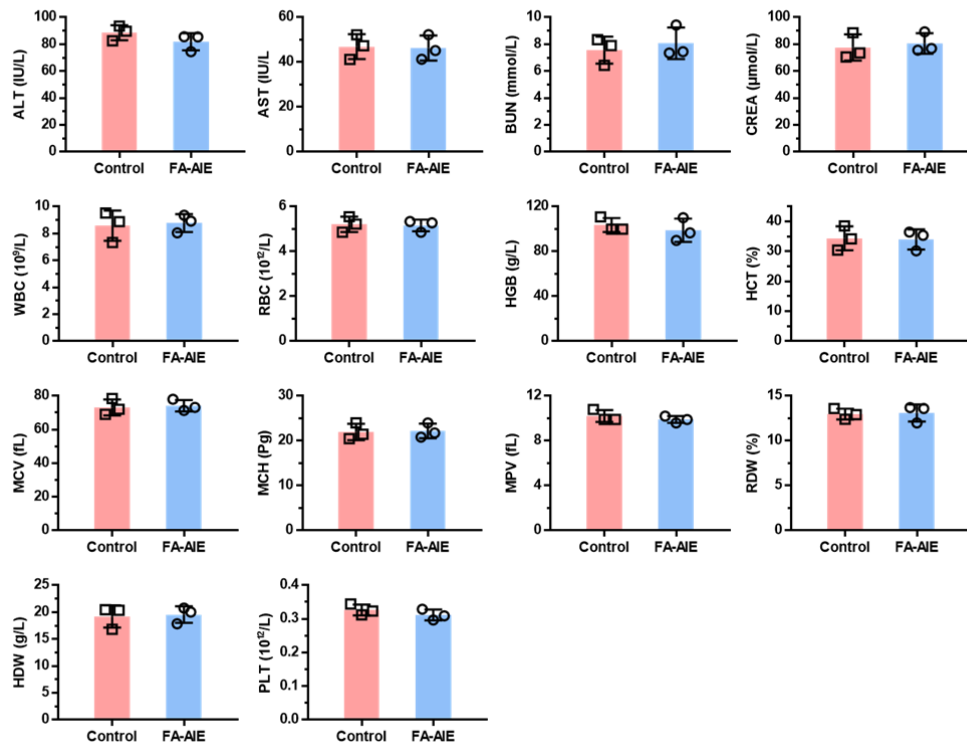

298

299

300

301

302

303

304

305

306

307

308

309

310

311

312

313

314

315

**Supplementary Figure 10. Blood test results for the SKOV3 tumor-bearing mice after intraperitoneal injection of folic-AIEgen.** There were no abnormalities in liver and kidney function, complete blood count and immune system over the 90-day post-treatment. Abbreviations: folic-AIEgen, FA-AIE, haemoglobin, Hb; red blood cell count, RBC; haematocrit, Hct; platelet count, PLT; white blood cell count, WBC; neutrophil granulocyte, NEUT; lymphocyte, LY; monocyte, MONO; eosinophil granulocyte, EOS; basophil granulocyte, BASO; alanine transaminase, ALT; aspartate transaminase, AST; blood urea nitrogen, BUN; creatinine, CRE. The regions rendered in GREEN represent the normal range. Before the operation, the animal is subject to blood testing as the normal control. **Data are means ± SD, n = 3.**

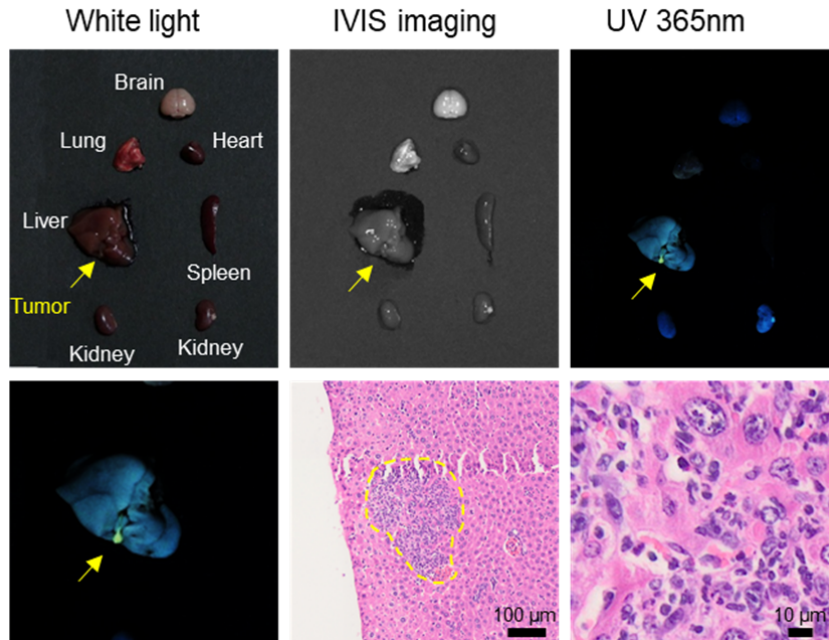

316  
 317  
 318  
 319  
 320  
 321  
 322  
 323  
 324  
 325  
 326  
 327  
 328  
 329  
 330

**Supplementary Figure 11. Targeted imaging of AIEgens in metastatic liver tumor.** Ex vivo images of major organs in Hela metastatic tumor-bearing mice under white light, IVIS imaging system, and UV light (top). Ex vivo image of the liver with tumor under UV light and representative H&E staining images (bottom). Yellow arrow and yellow circle: metastatic tumor. The experiment was repeated at least three times.



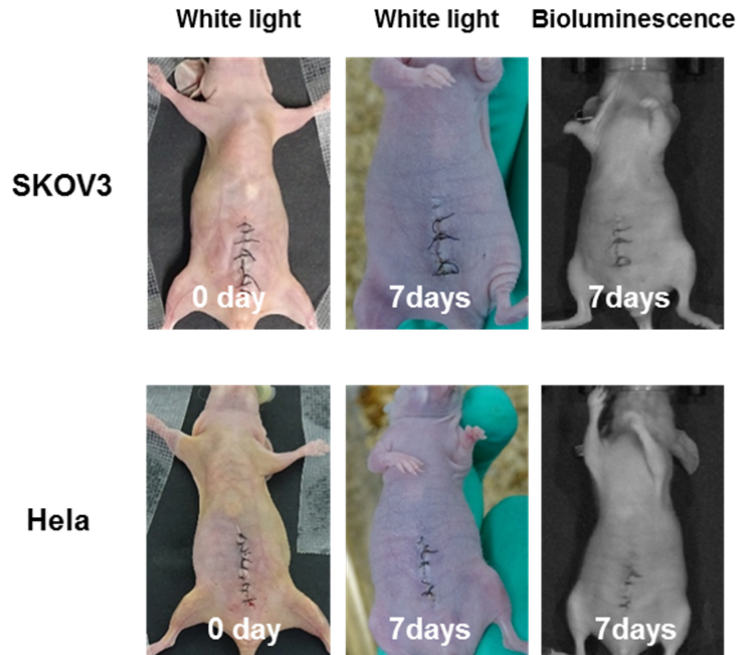

331

332

333 **Supplementary Figure 12. White light and bioluminescence images of**  
 334 **intraperitoneal SKOV3 and Hela tumors bearing mice after surgery. 7 days after**  
 335 **surgery, there were no signs of recurrence observed via bioluminescence** imaging.

336

337

338

339

340

341

342

343

344

345

346

347

348

349

350

351

352

353

354

355

356

357

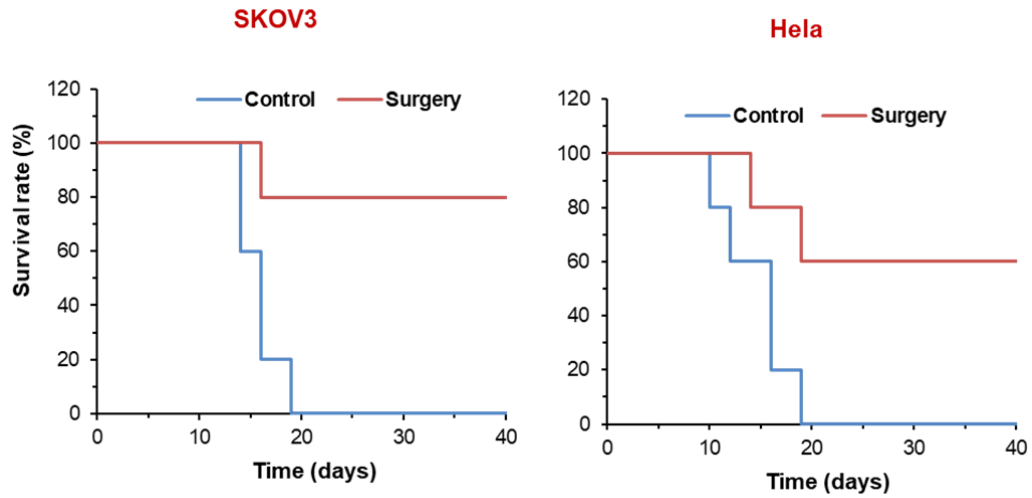

358

359

360 **Supplementary Figure 13. Survival rate of intraperitoneal SKOV3 and Hela**  
 361 **tumors bearing mice with or without surgery.**

362

363

364

365

366

367

368

369

370

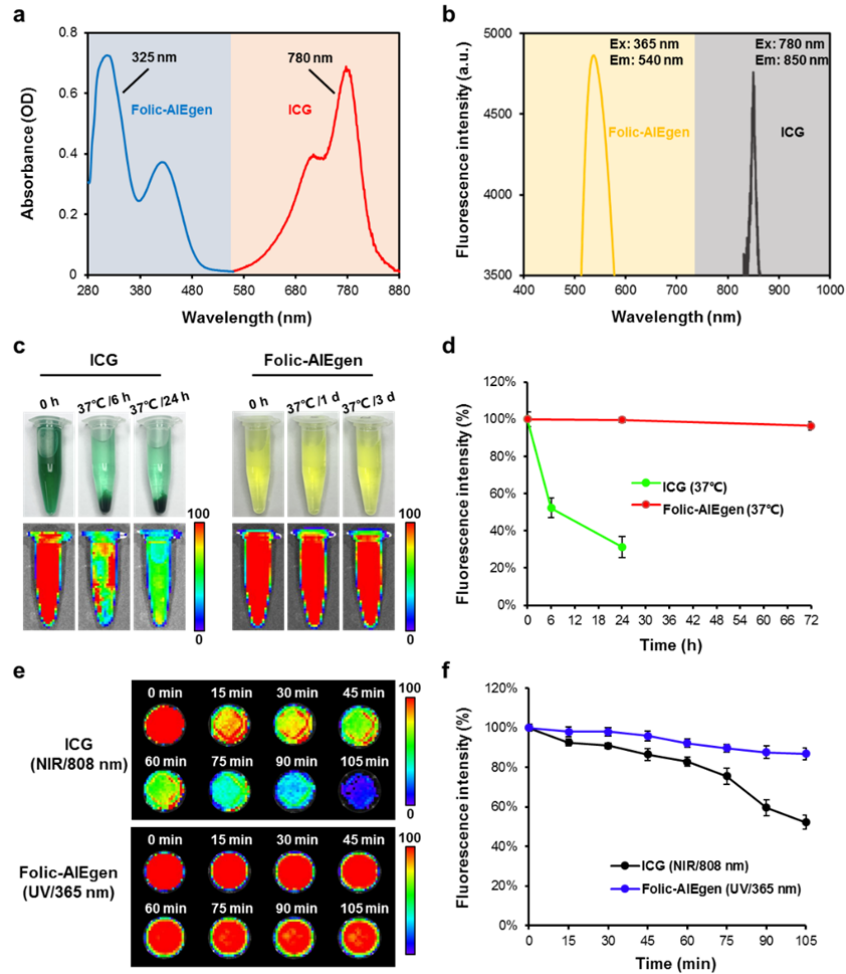

371

372

373

374

375

376

377

378

379

380

381

382

383

384

**Supplementary Figure S14. Comparison of fluorescence characteristics and stability between ICG and folic-AIEgen.** (a) UV-vis spectra and (b) fluorescence spectra of ICG and folic-AIEgen. (c) Time-dependent photographs (top) and fluorescence imaging (bottom) of ICG (250  $\mu\text{g}/\text{mL}$ ) and folic-AIEgen (40  $\mu\text{g}/\text{mL}$ ) in PBS at 37  $^{\circ}\text{C}$ . (d) Quantitative analysis of the fluorescence signals of ICG and folic-AIEgen in fluorescence imaging. Data are means  $\pm$  SD,  $n = 3$ . (e) Time-dependent fluorescence imaging of ICG (NIR, 808 nm, 250  $\mu\text{g}/\text{mL}$ ) and folic-AIEgen (365 nm, 40  $\mu\text{g}/\text{mL}$ ) subjected to continuous laser irradiation. (f) Quantitative analysis of the fluorescence signals of ICG and folic-AIEgen in fluorescence imaging. Data are means  $\pm$  SD,  $n = 3$ .

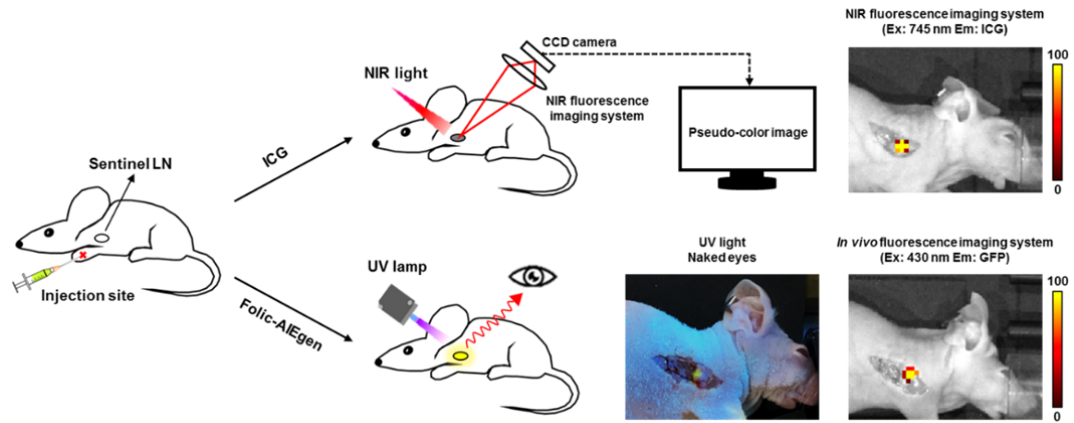

385  
 386  
 387  
 388  
 389  
 390  
 391  
 392  
 393  
 394

**Supplementary Figure S15. Schematic illustration of ICG and folic-AIEgen guided SLN dissection in nude mice.** NIR fluorescence imaging of ICG (250 µg/mL, 25 µL) administered mice with skin removal was imaged by NIR fluorescence imaging system. Photographs and fluorescence imaging of folic-AIEgen (40 µg/mL, 25 µL) administered mice with skin removal were recorded under UV light and IVIS imaging system, respectively.

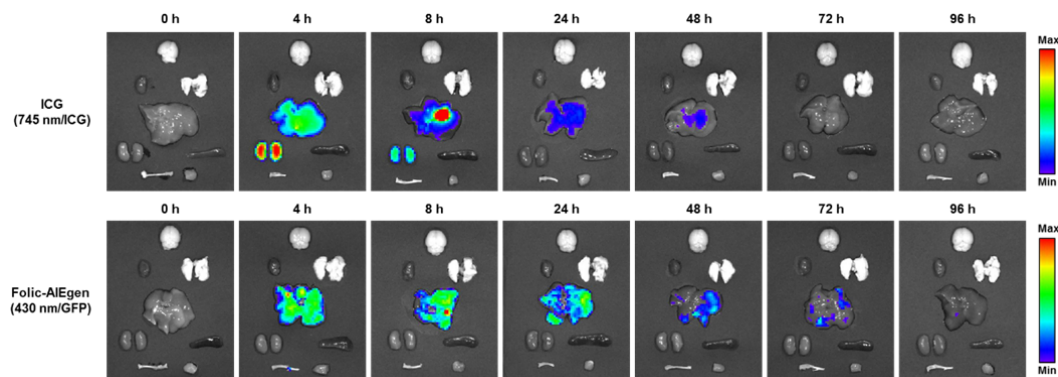

395

396

397

398

399

400

401

402

403

404

**Supplementary Figure 16. Biodistribution of ICG and folic-AIEgen in nude mice after intravenous administration.** Ex vivo fluorescence imaging of major tissues (brain, heart, lung, liver, kidney, spleen, bone and muscle) of mice (n = 6) collected at different time points after intravenous injection with ICG (250 µg/ml, 100 µL) or folic-AIEgen (40 µg/ml, 100 µL). Images in different groups were required under the corresponding instrumental conditions (Ex: 745 nm/Em: ICG for ICG group, Ex: 430 nm/Em: GFP for folic-AIEgen group).
